# Supplementary material for: Imaging of large volume subcutaneous deposition using MRI: exploratory clinical study results
Source: Springer Nature journal article supplement (doi:10.1007/s13346-023-01318-7), 2023-03-13

**Supplemental Figure 1: All MR images, depot and tissue reconstructions, and SC tissue thickness heatmaps from LVSC thigh, abdomen, and arm injection sites.** (Top row) Each image series ranges from naïve tissue/catheter placement through maximum injection volume (left to right) up to 10 mL cumulative injection in thigh and abdomen and 5 mL in the arm. (Second row) SC thickness heat maps of the area around the injection site demonstrate increasing thickness with volume (dark blue increasing to yellow, orange, and dark red sequentially; scales vary with each specific tissue locale). (Third and fourth rows) Reconstructed 3D images demonstrating top and side views of the 2 (green), 5 (blue), 10 (magenta) mL and post set removal (yellow) depots alone. (Bottom row) The 3D depot images within the ID/SC interface and SC/IM interface give context to depot location and topology within the tissue. Depot dimensions are not shown to scale between rows or between injection sites but meant to show relative depot shapes and locations; depot dimensions for each example site are shown to scale across columns of increasing volume.

# 009 Abdomen Left

Naive

Cannula

2ml

5ml

10ml

Post

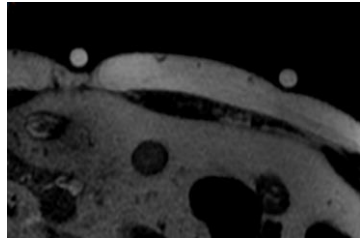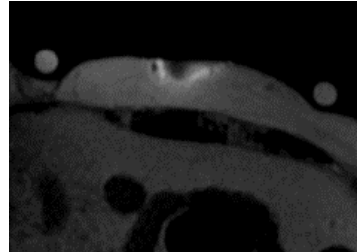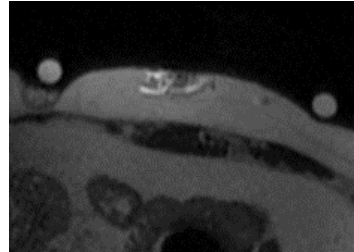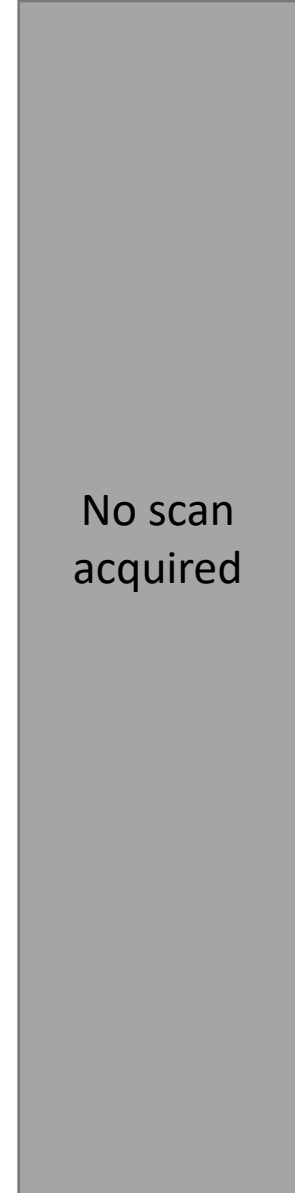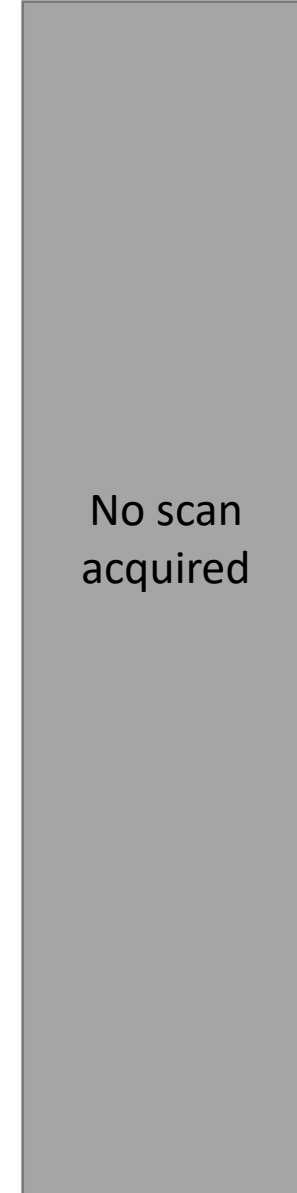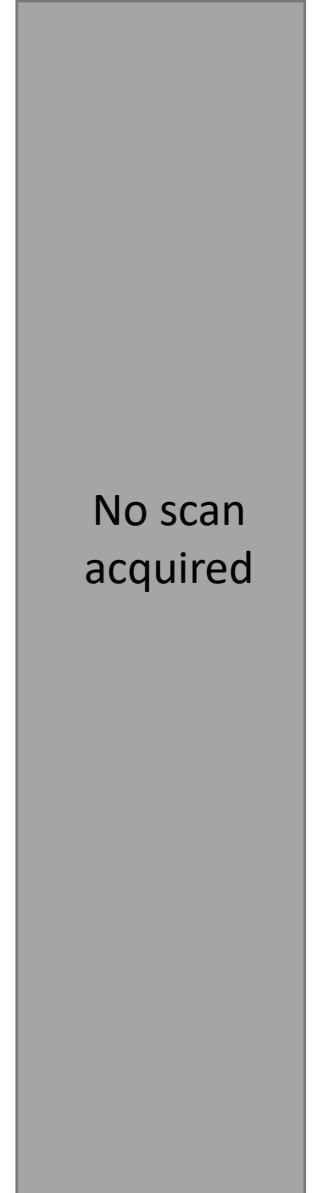

Thickness  
Units:[mm]

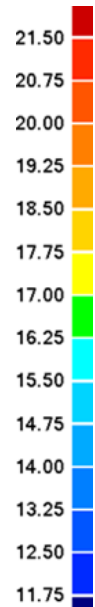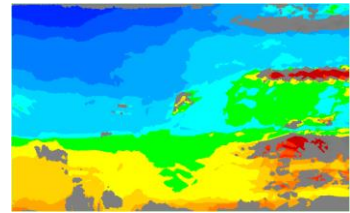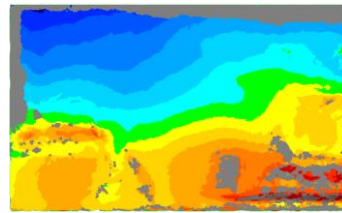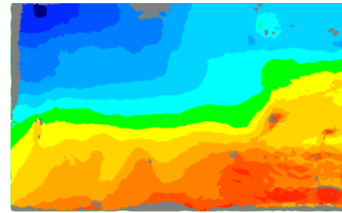

Pre-injection  
no depot

Pre-injection  
no depot

Depot Top  
View

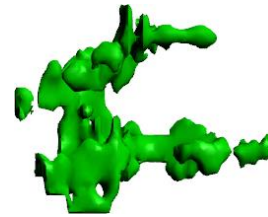

Depot Side  
View

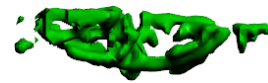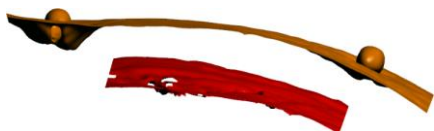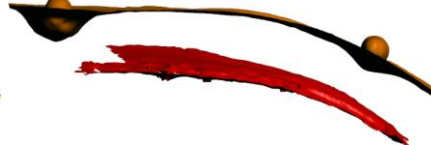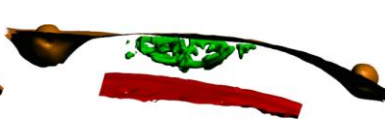

# 009 Abdomen Right

Naive

Cannula

2ml

5ml

10ml

Post

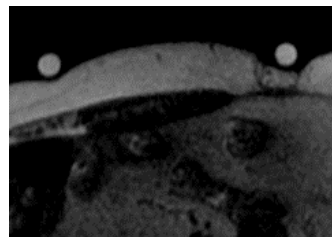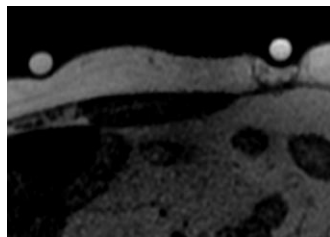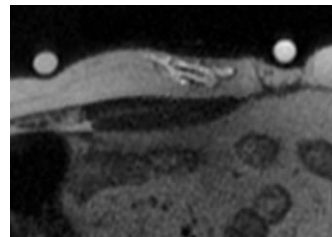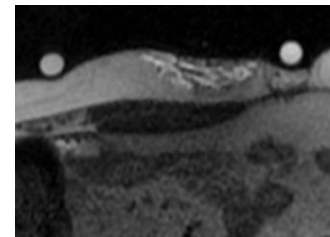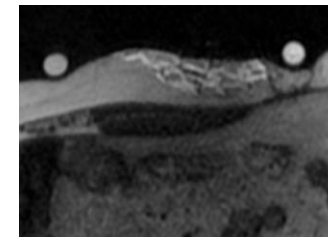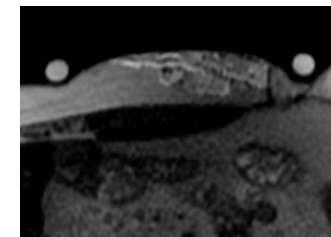

Thickness  
Units:[mm]

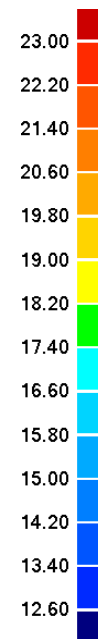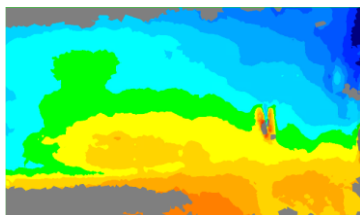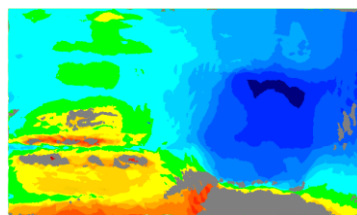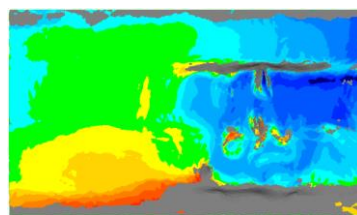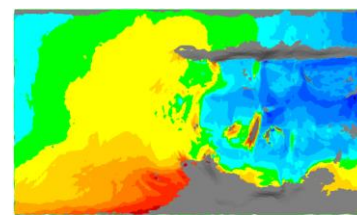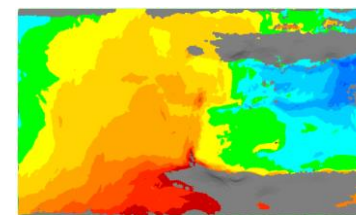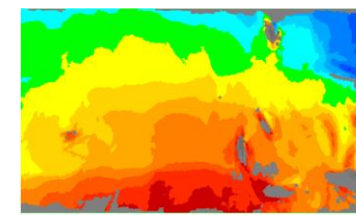

Pre-injection  
no depot

Pre-injection  
no depot

Depot Top  
View

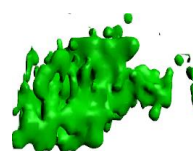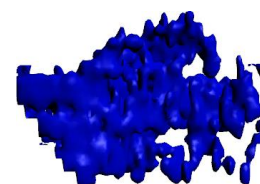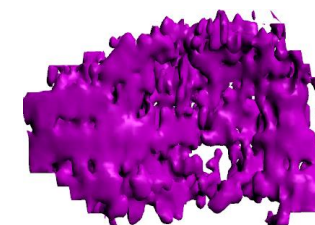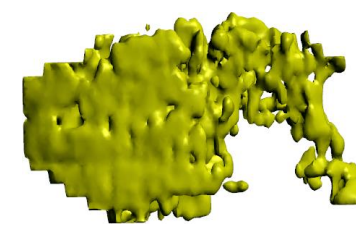

Depot Side  
View

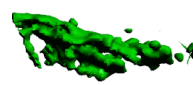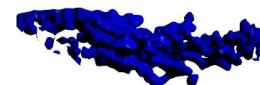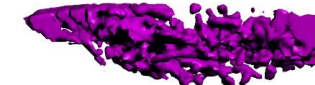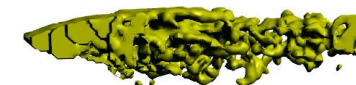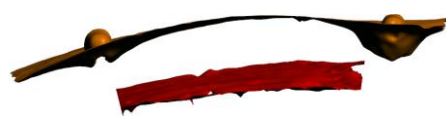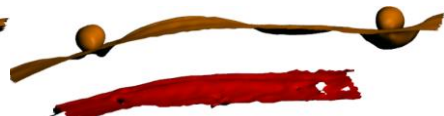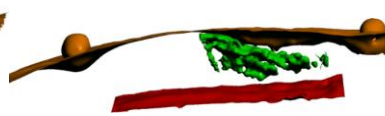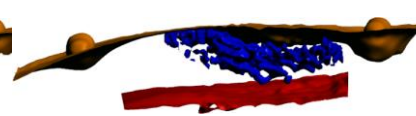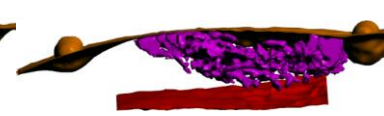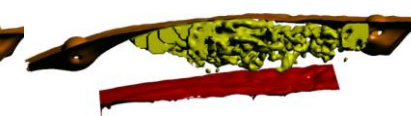

# 009 Thigh Left

Naive

Cannula

2ml

5ml

10ml

Post

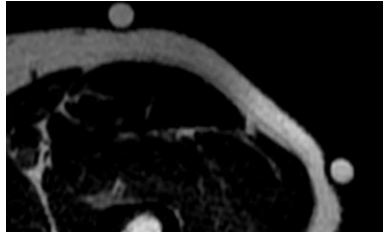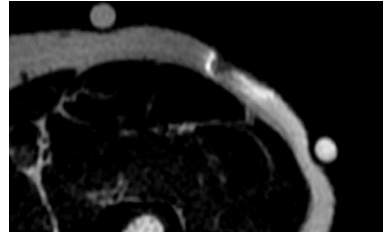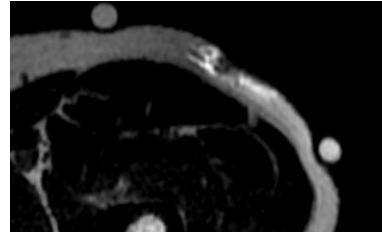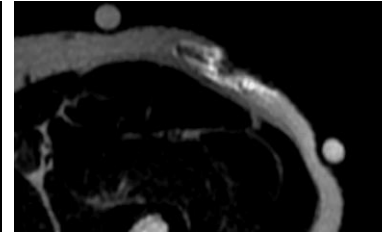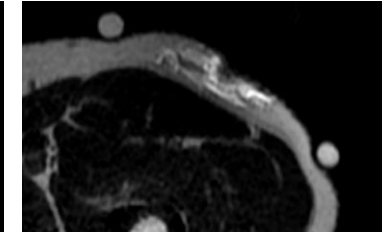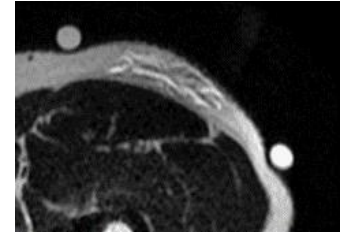

Thickness  
Units:[mm]

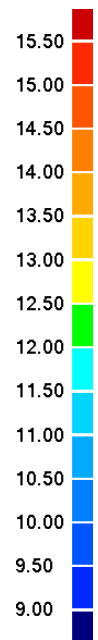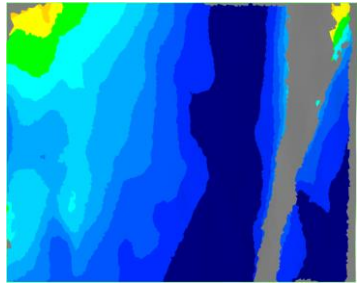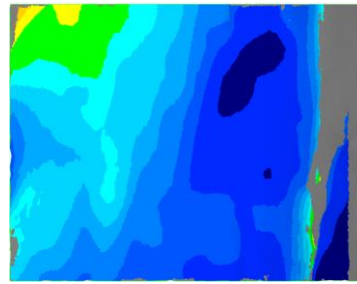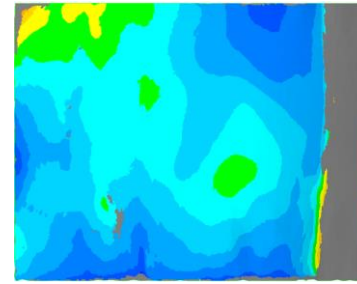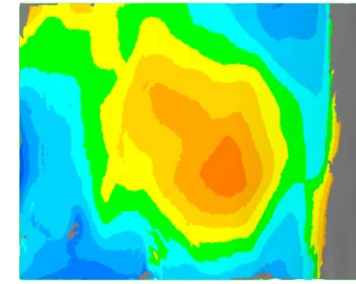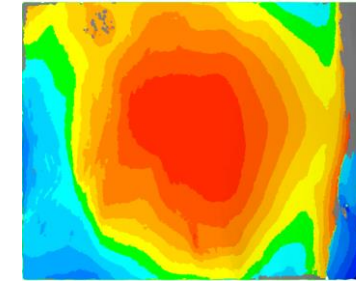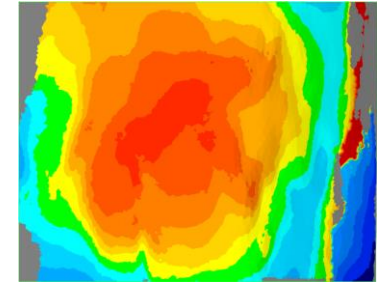

Pre-injection  
no depot

Pre-injection  
no depot

Depot Top  
View

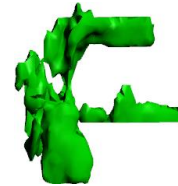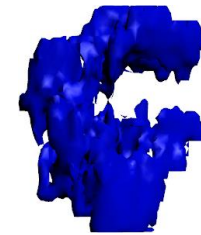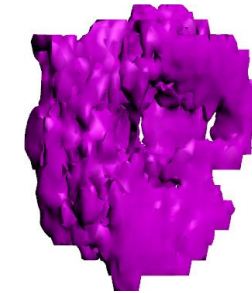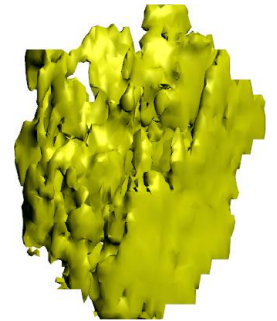

Depot Side  
View

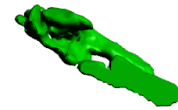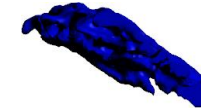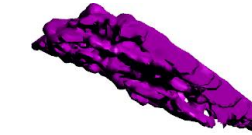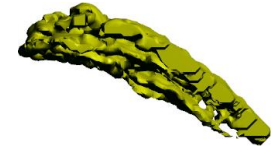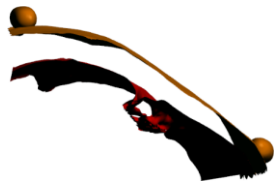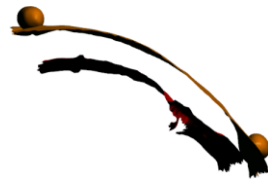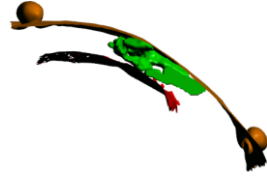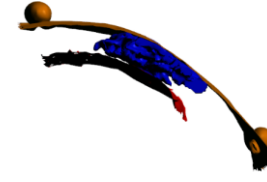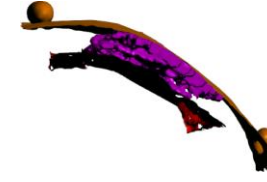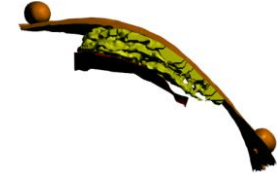



# 009 Thigh Right

5A

Naive

Cannula

2ml

5ml

10ml

Post

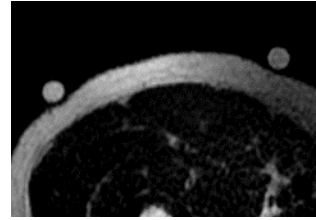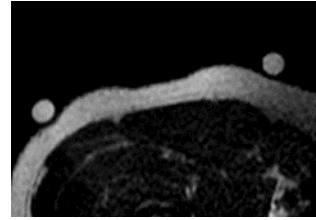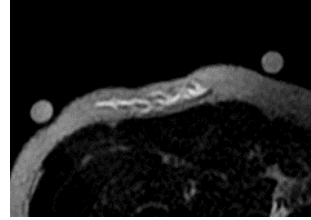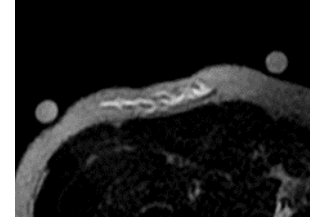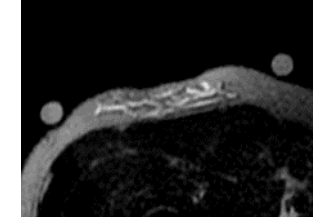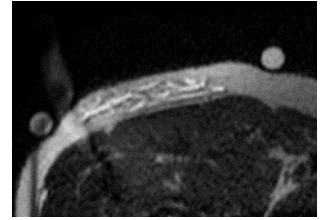

Thickness  
Units:[mm]

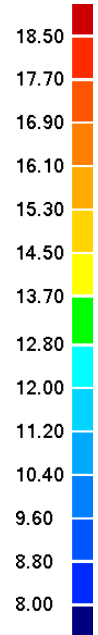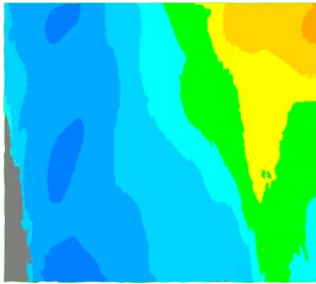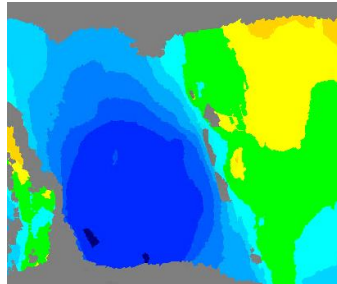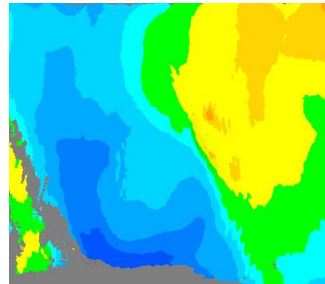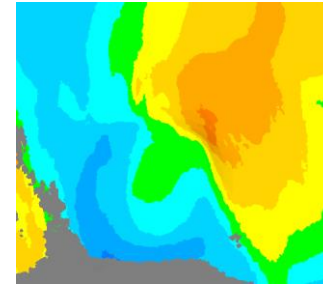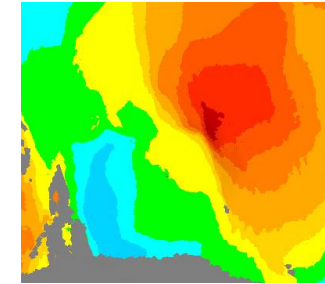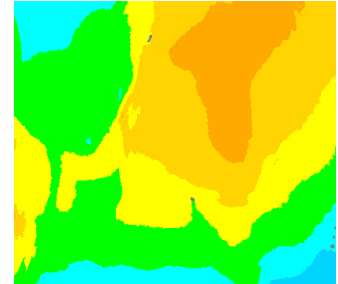

Pre-injection  
no depot

Pre-injection  
no depot

Depot Top  
View

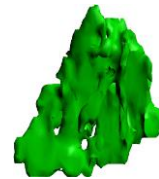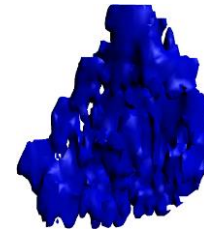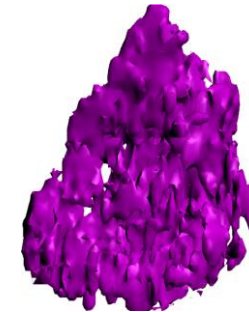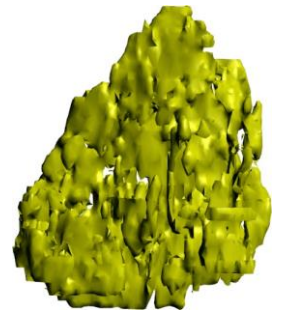

Depot Side  
View

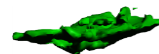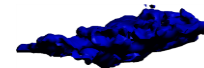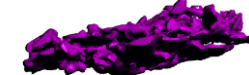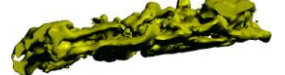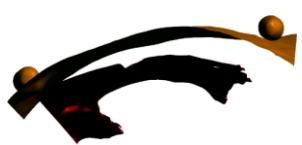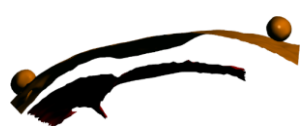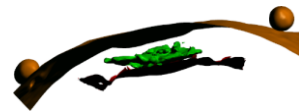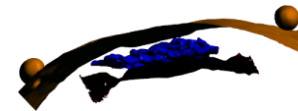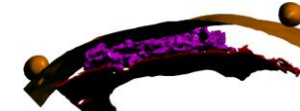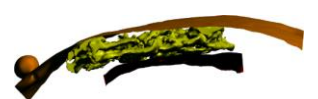

# 010 Abdomen Left

Naive

Cannula

2ml

5ml

10ml

Post

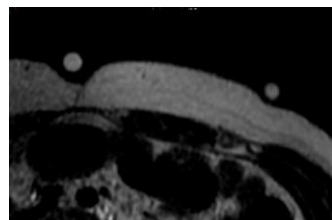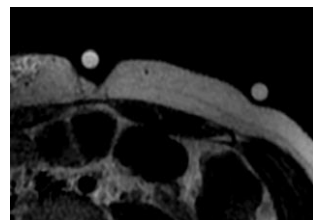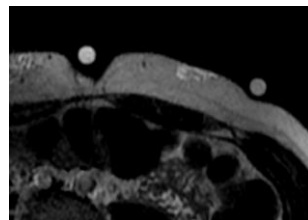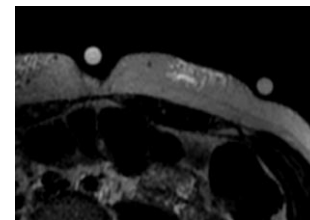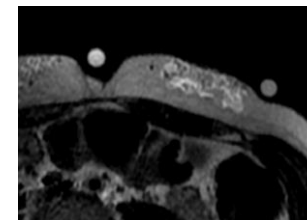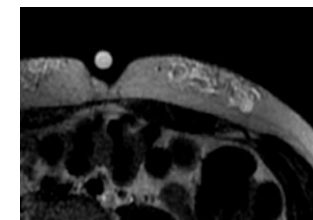

Thickness  
Units:[mm]

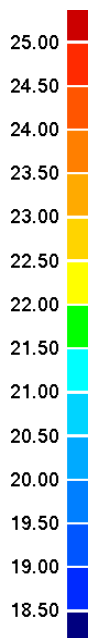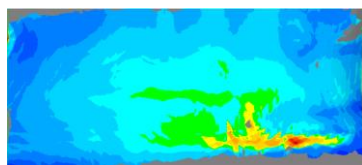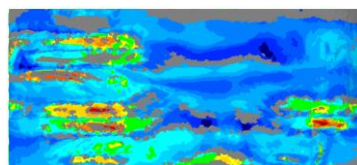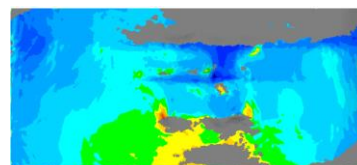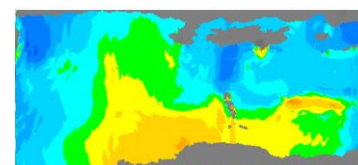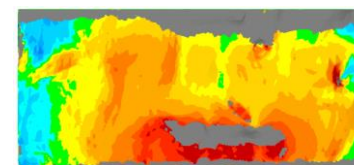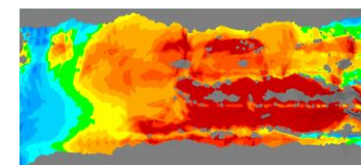

Pre-injection  
no depot

Pre-injection  
no depot

Depot Top  
View

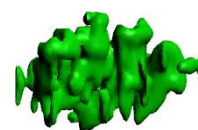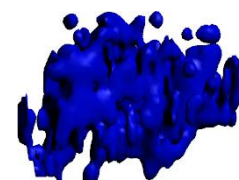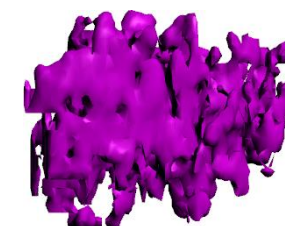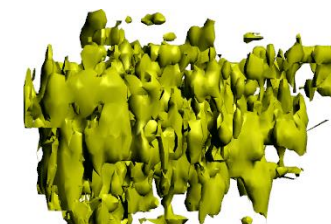

Depot Side  
View

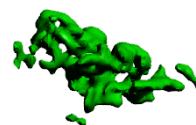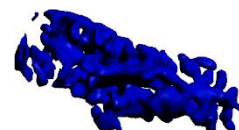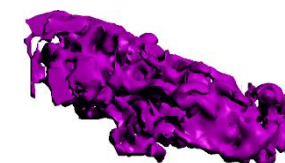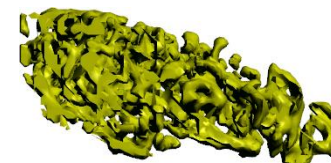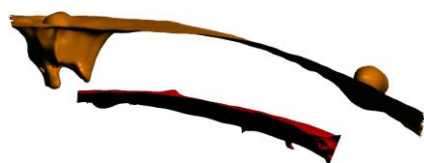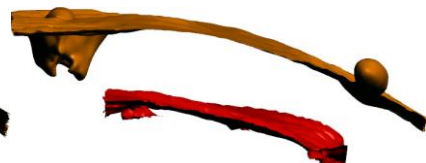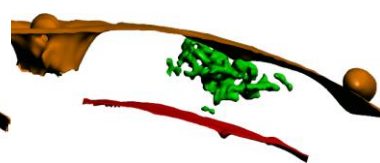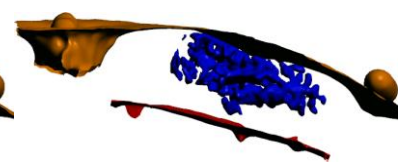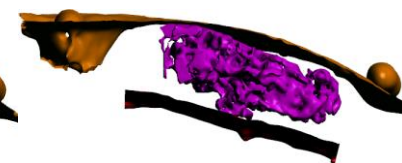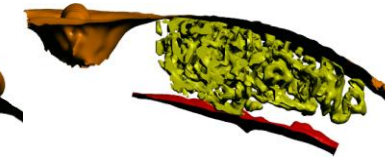



# 010 Abdomen Right

5B

Naive

Cannula

2ml

5ml

10ml

Post

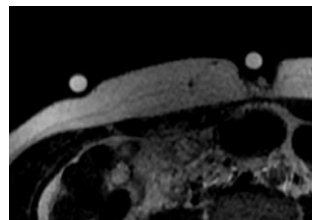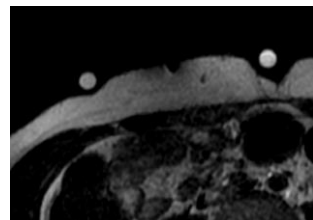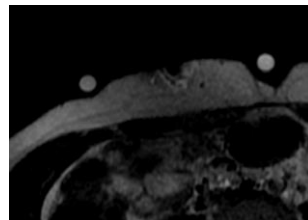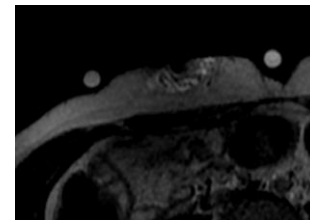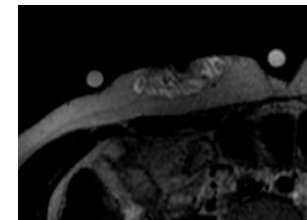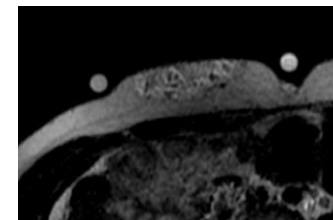

Thickness  
Units:[mm]

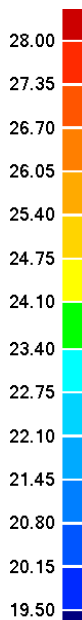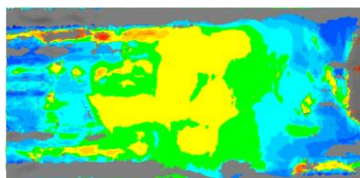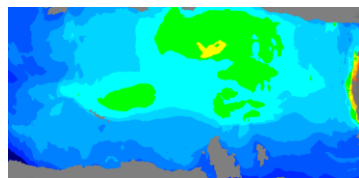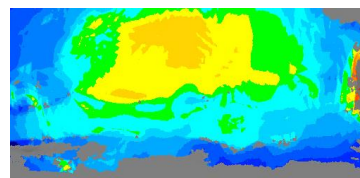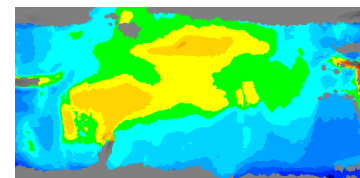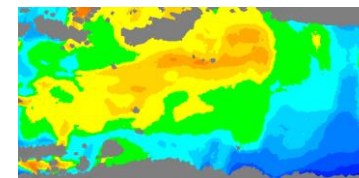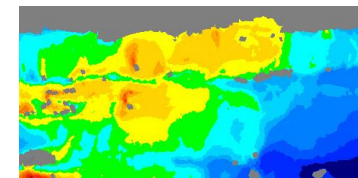

Pre-injection  
no depot

Pre-injection  
no depot

Depot Top  
View

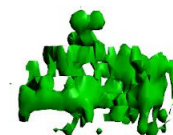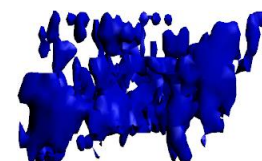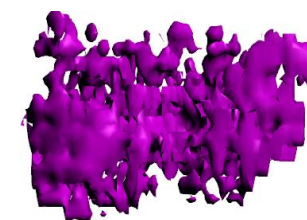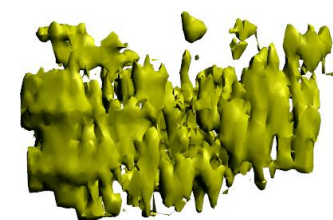

Depot Side  
View

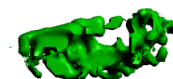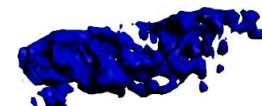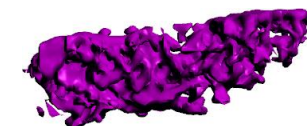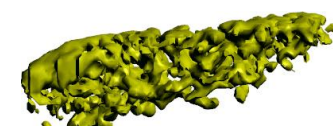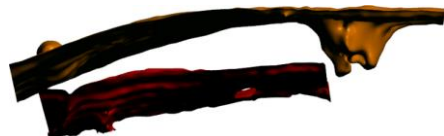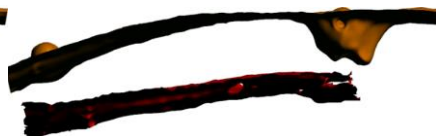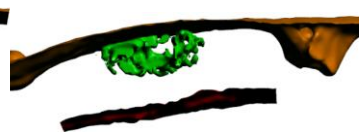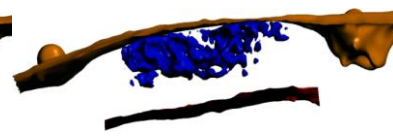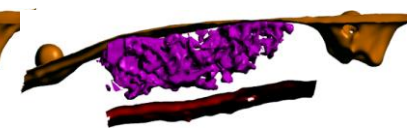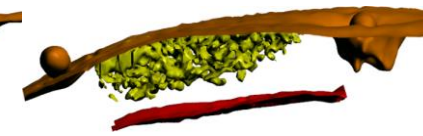

# 010 Arm Left

Naive

Cannula

2ml

5ml

Post

No scan  
acquired

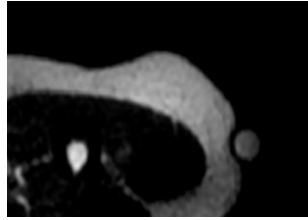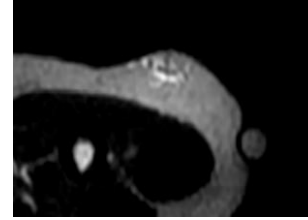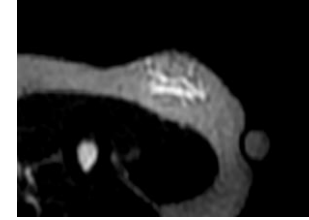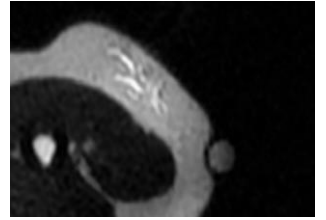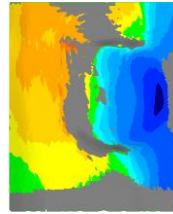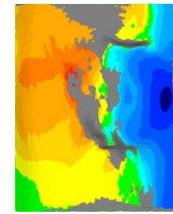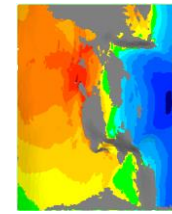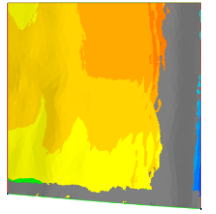

Depot Top  
View

Pre-injection  
no depot

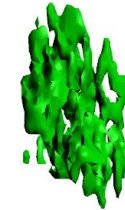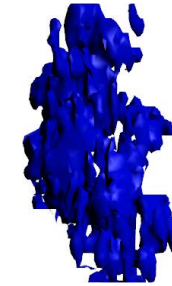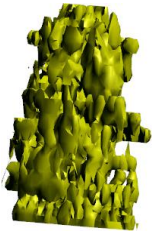

Depot Side  
View

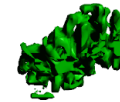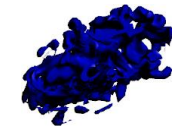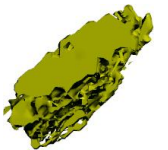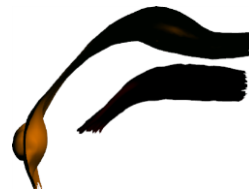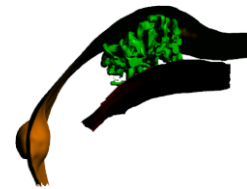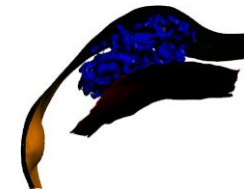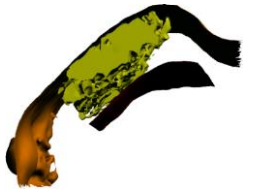

Thickness  
Units:[mm]

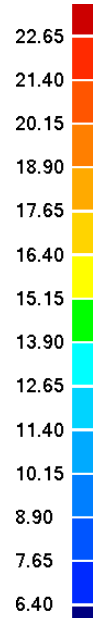

Pre-injection  
no depot



# 010 Thigh Left

Naive

Cannula

2ml

5ml

10ml

Post

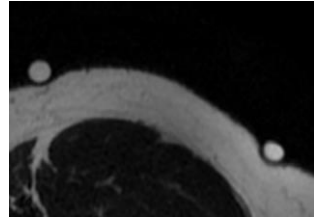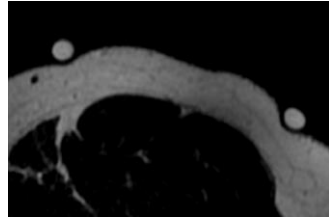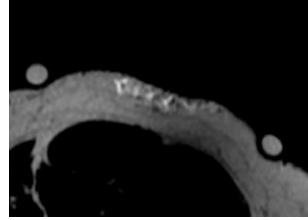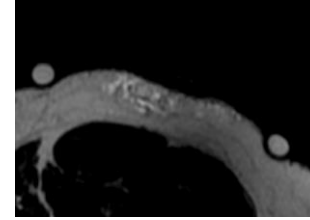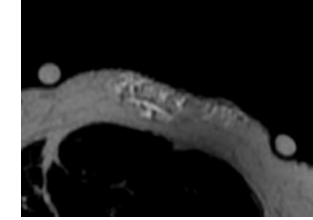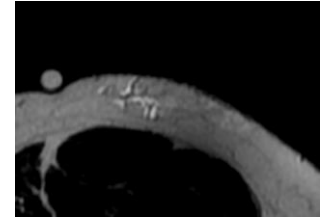

Thickness  
Units:[mm]

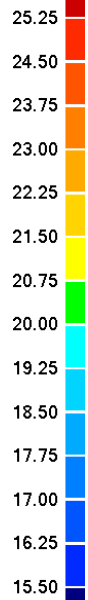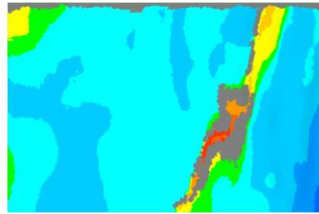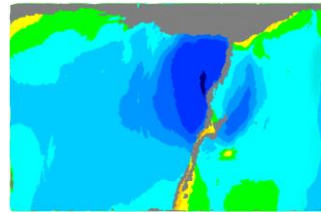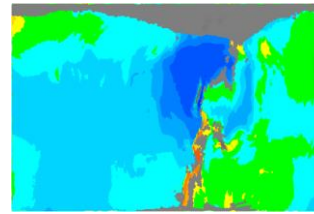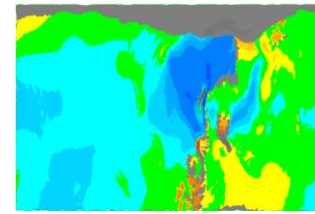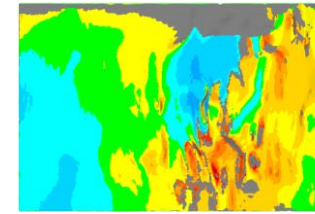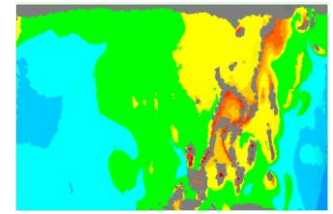

Pre-injection  
no depot

Pre-injection  
no depot

Depot Top  
View

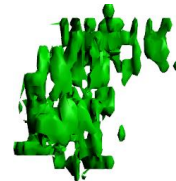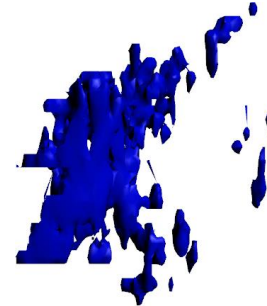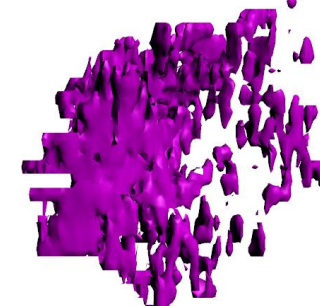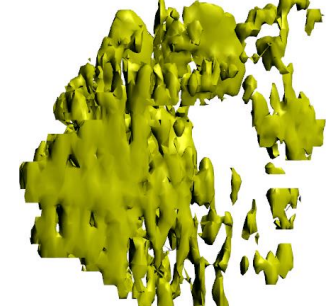

Depot Side  
View

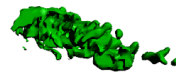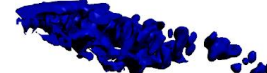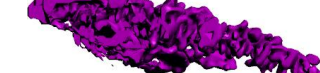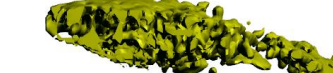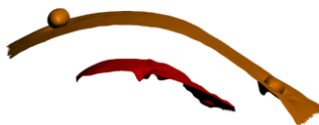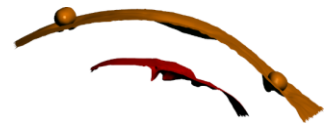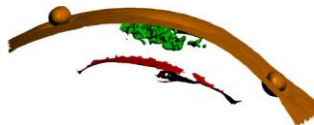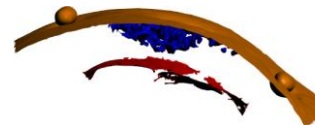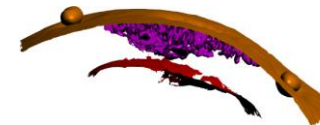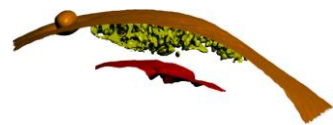

# 010 Thigh Right

Naive

Cannula

2ml

5ml

10ml

Post

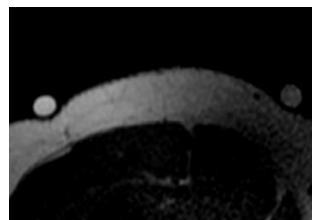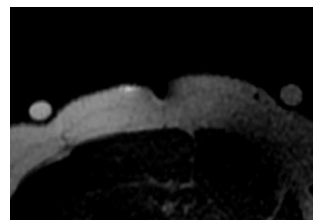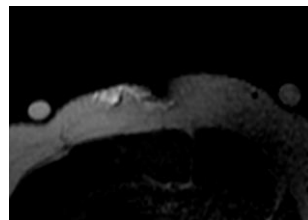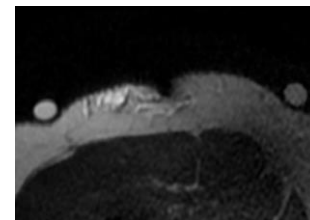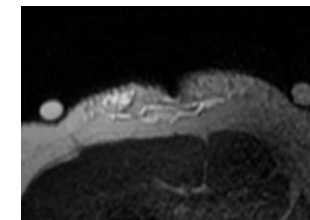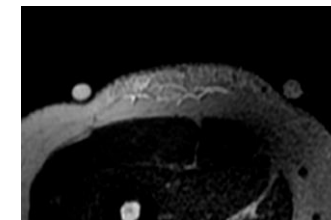

Thickness  
Units:[mm]

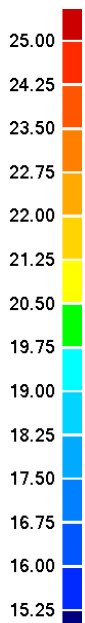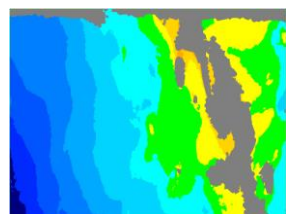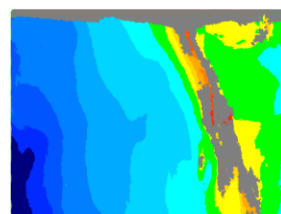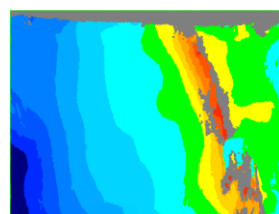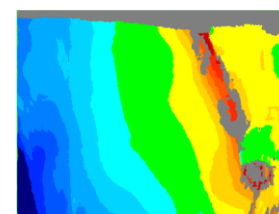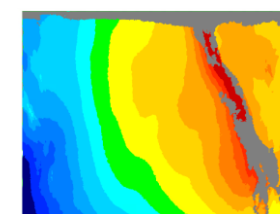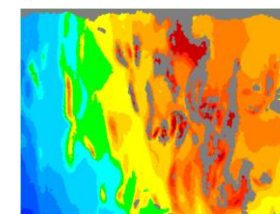

Pre-injection  
no depot

Pre-injection  
no depot

Depot Top  
View

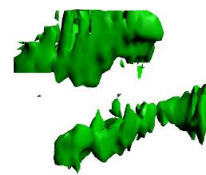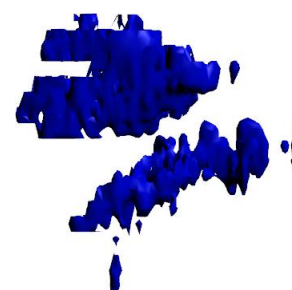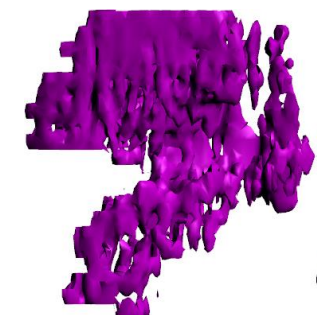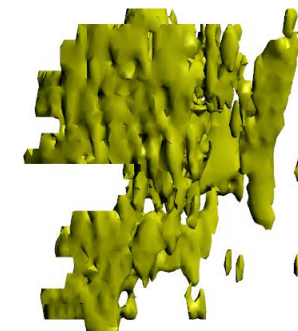

Depot Side  
View

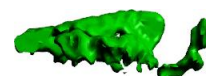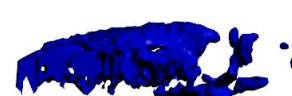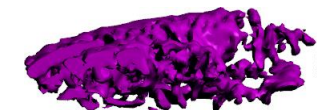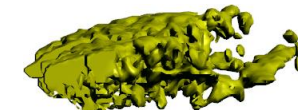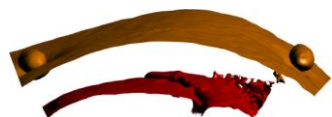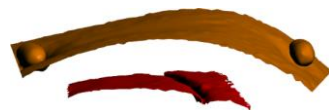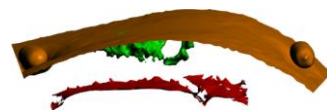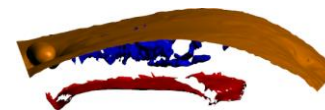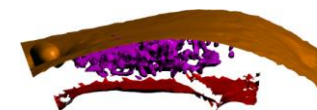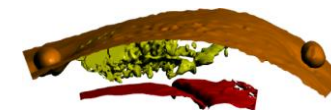

# 011 Abdomen Left

Naive

Cannula

2ml

5ml

10ml

Post

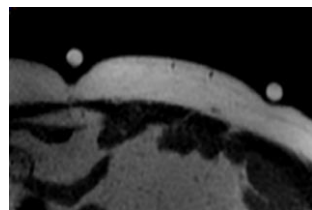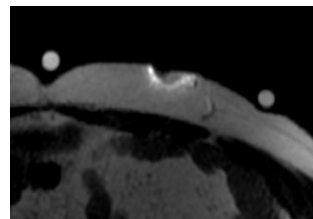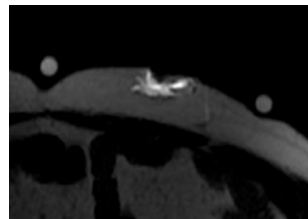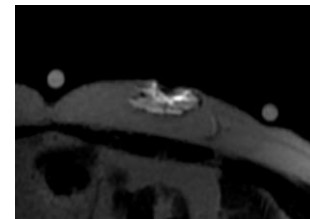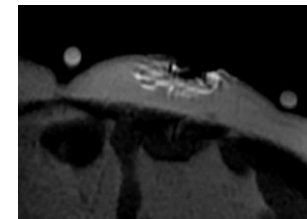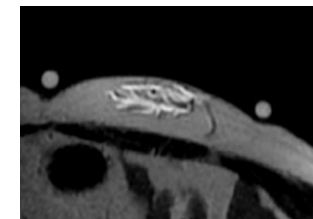

Thickness  
Units:[mm]

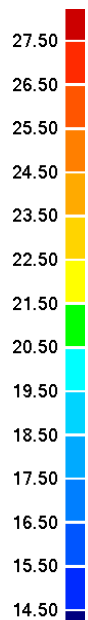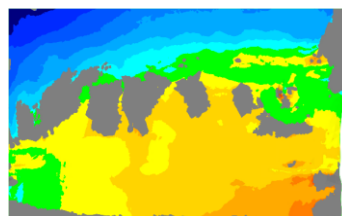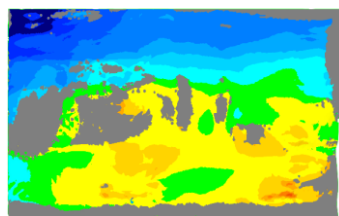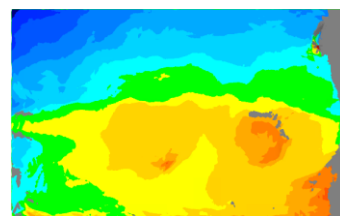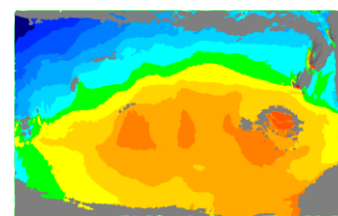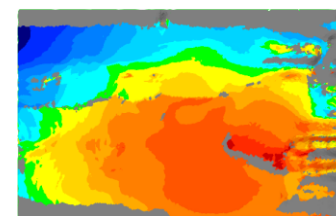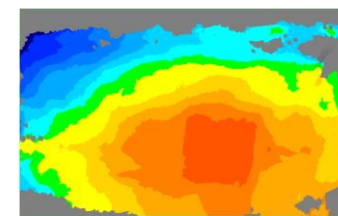

Pre-injection  
no depot

Pre-injection  
no depot

Depot Top  
View

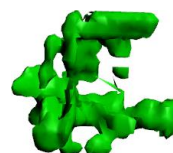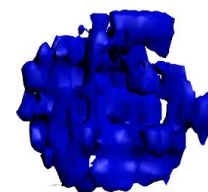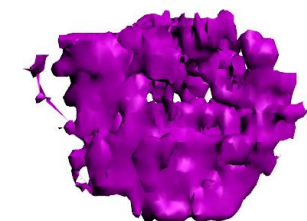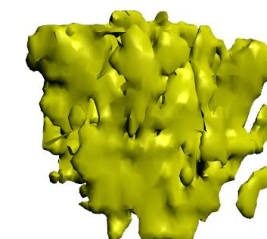

Depot Side  
View

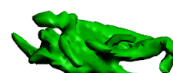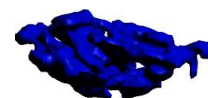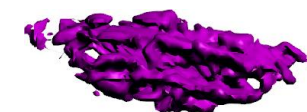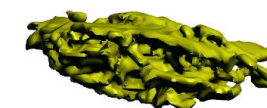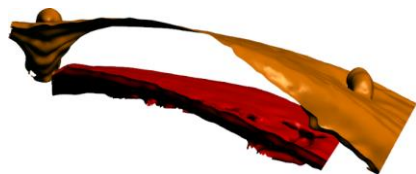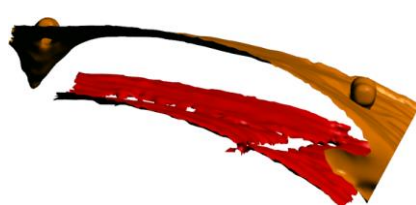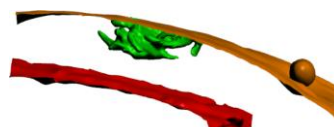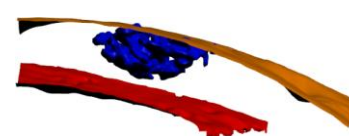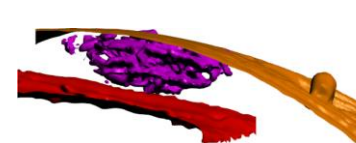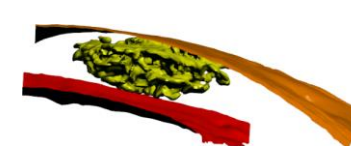



# 011 Abdomen Right

Naive

Cannula

2ml

5ml

10ml

Post

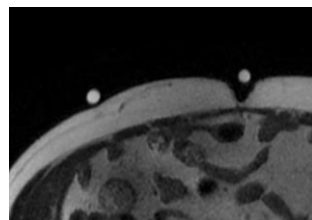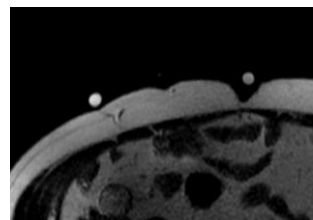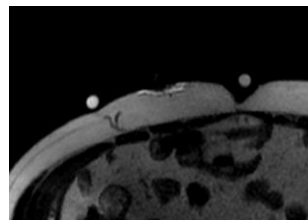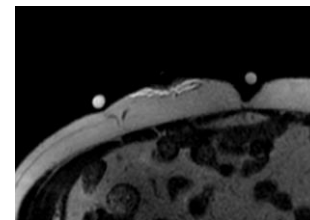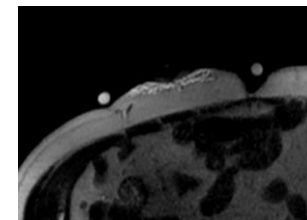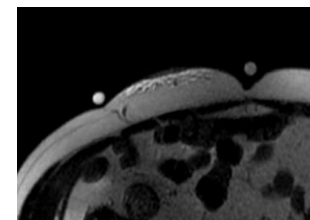

Thickness  
Units:[mm]

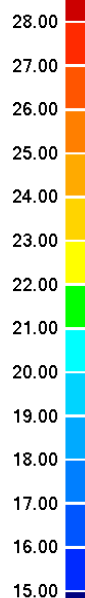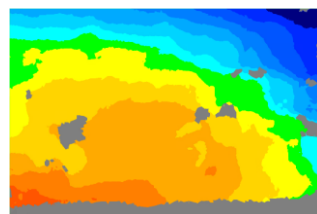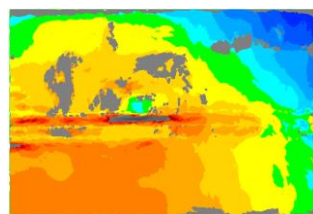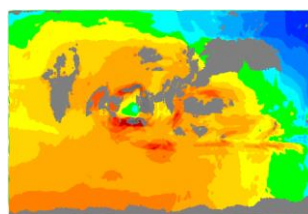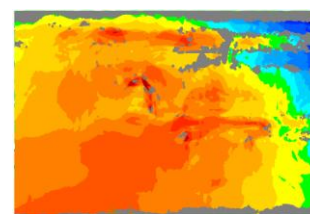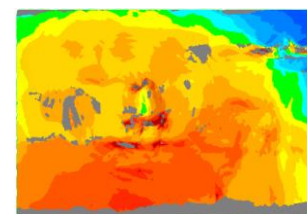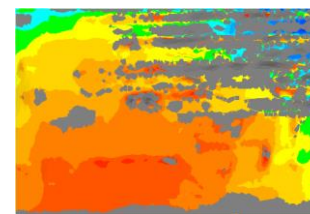

Pre-injection  
no depot

Pre-injection  
no depot

Depot Top  
View

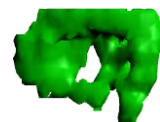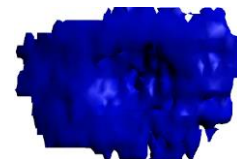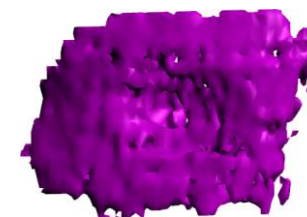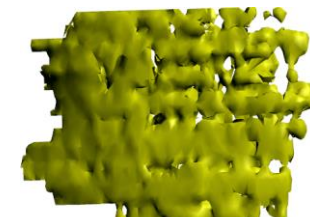

Depot Side  
View

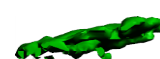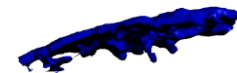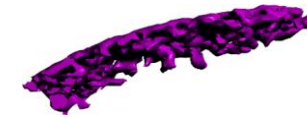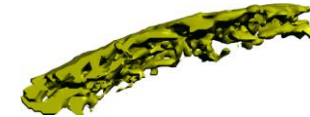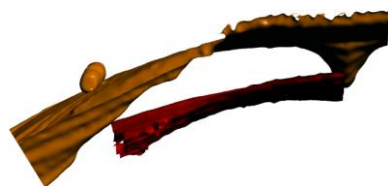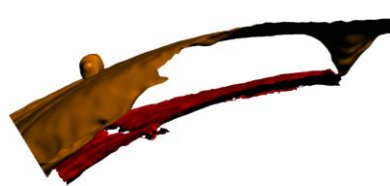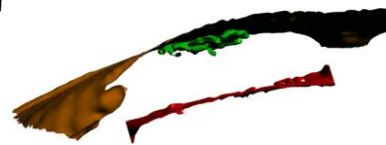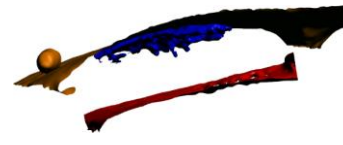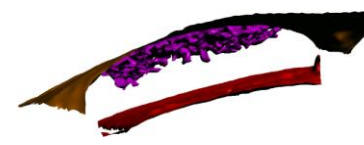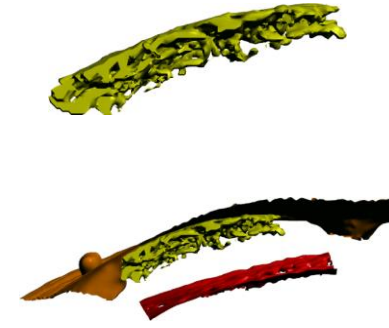

# 011 Arm Right

Naive

Cannula

2ml

5ml

Post

No scan  
acquired

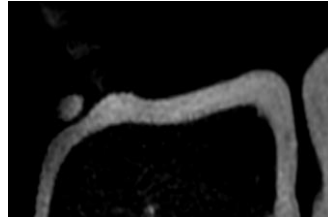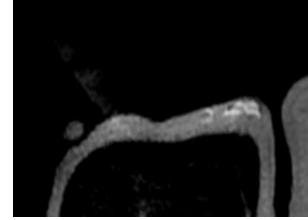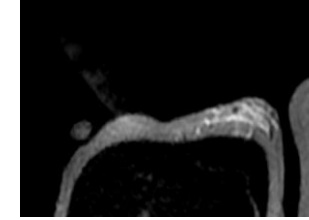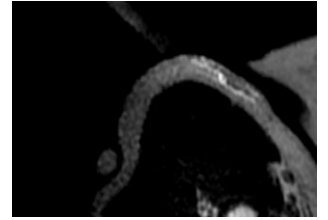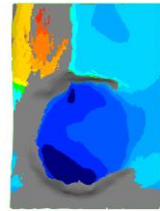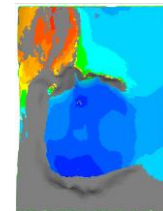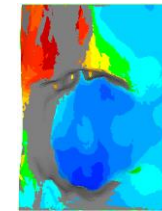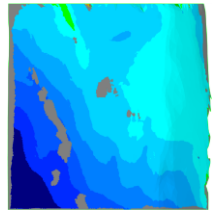

Depot Top  
View

Pre-injection  
no depot

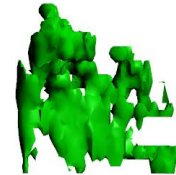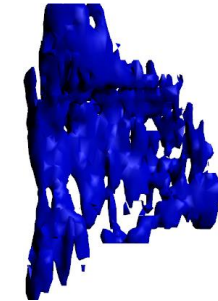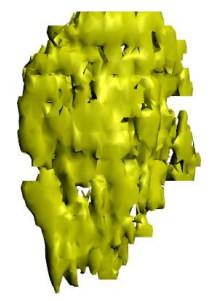

Depot Side  
View

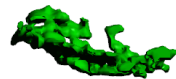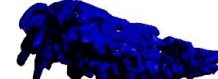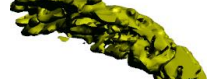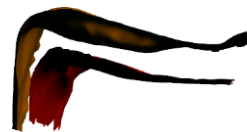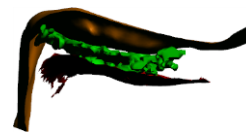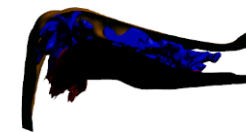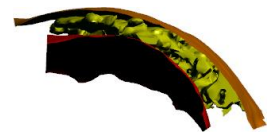

Pre-injection  
no depot

Thickness  
Units:[mm]

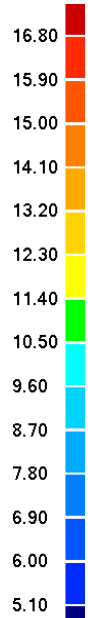

# 011 Thigh Left

Naive

Cannula

2ml

5ml

10ml

Post

No scan  
acquired

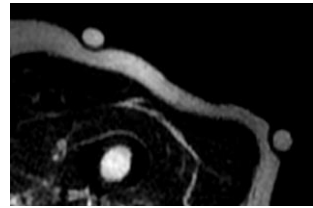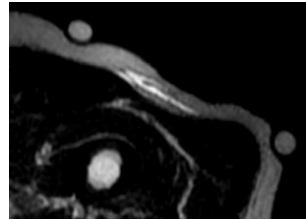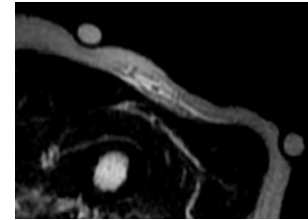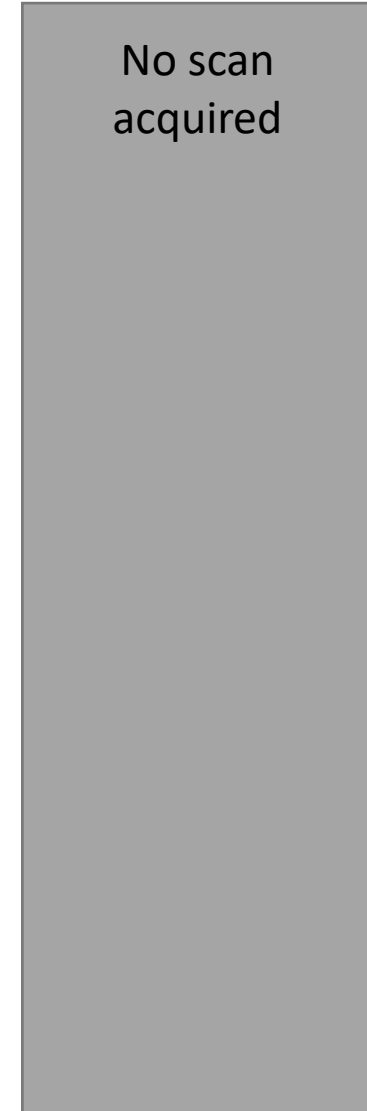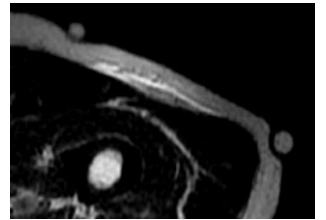

No scan  
acquired

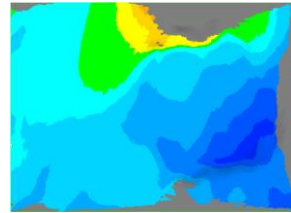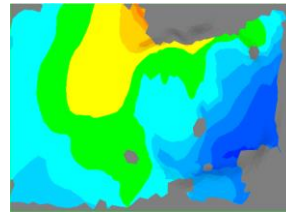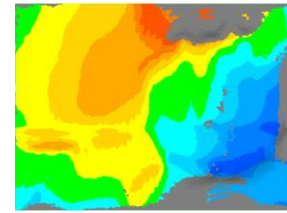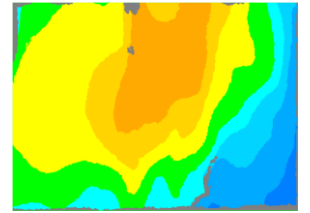

Depot Top  
View

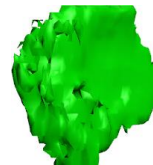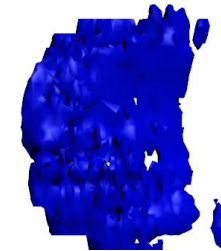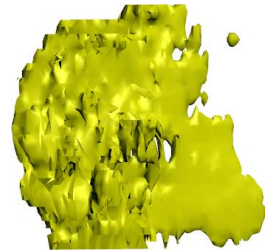

Depot Side  
View

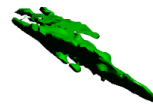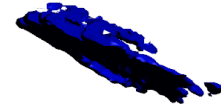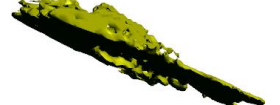

Pre-injection  
no depot

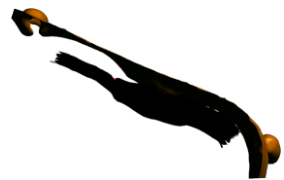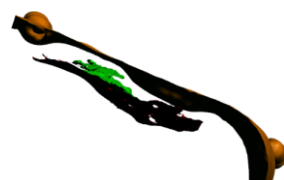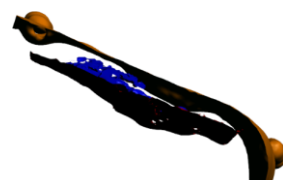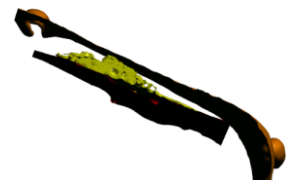

Pre-injection  
no depot

Thickness  
Units:[mm]

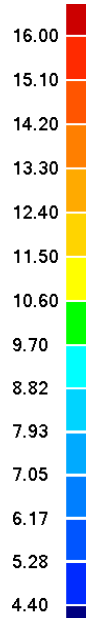



# 011 Thigh Right

Naive

Cannula

2ml

5ml

10ml

Post

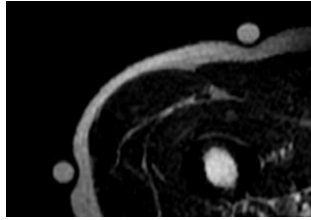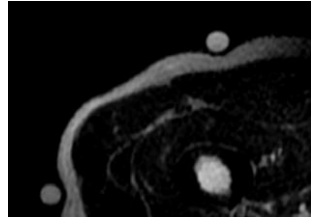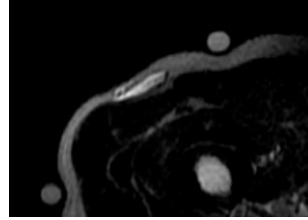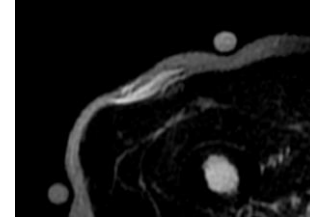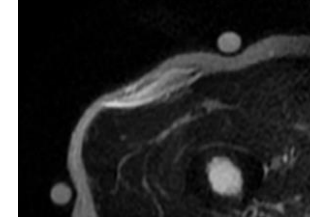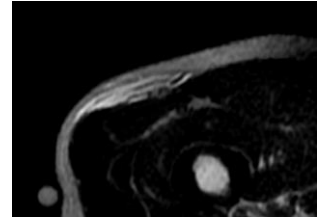

Thickness  
Units:[mm]

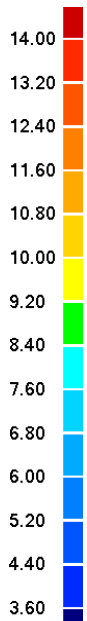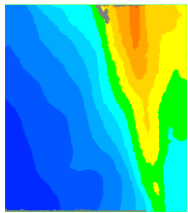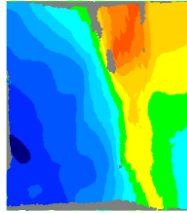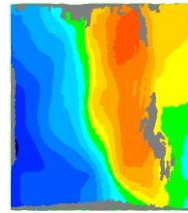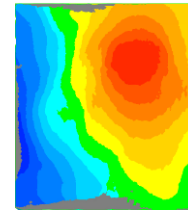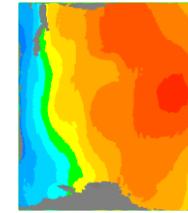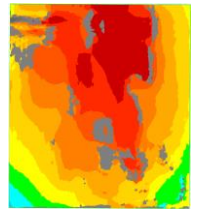

Pre-injection  
no depot

Pre-injection  
no depot

Depot Top  
View

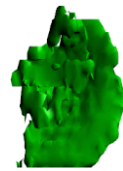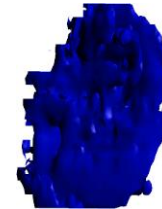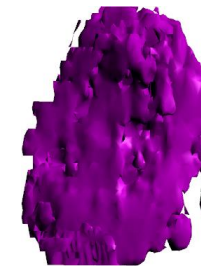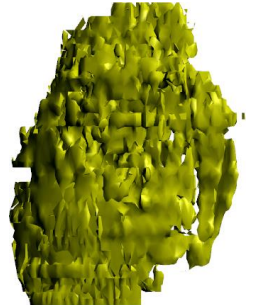

Depot Side  
View

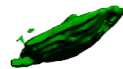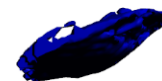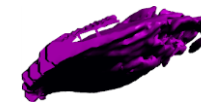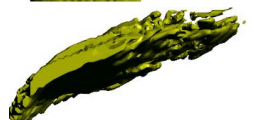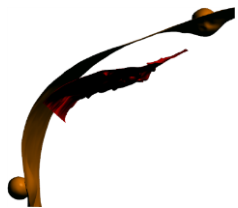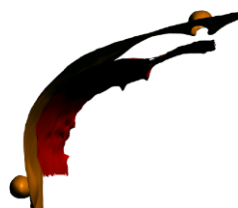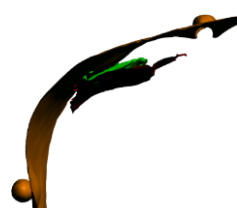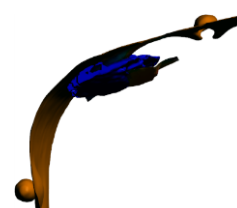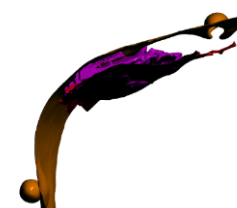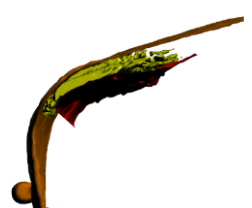

# 012 Abdomen Left

Naive

Cannula

2ml

5ml

10ml

Post

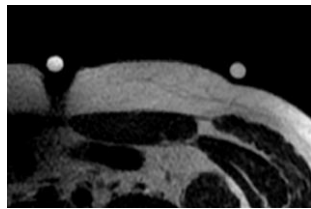

No scan  
acquired

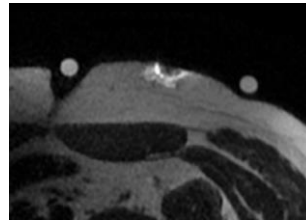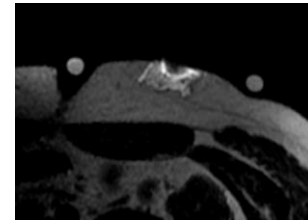

No scan  
acquired

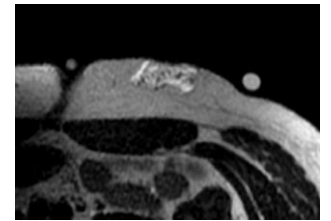

Thickness  
Units:[mm]

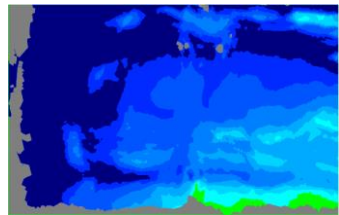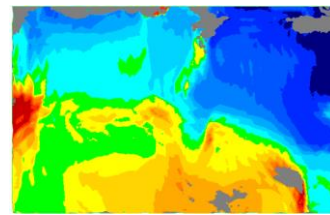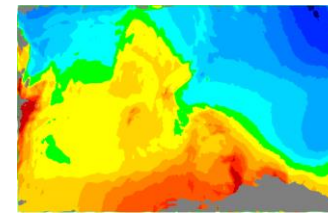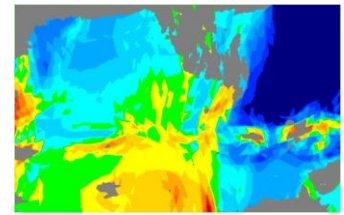

Pre-injection  
no depot

Pre-injection  
no depot

Depot Top  
View

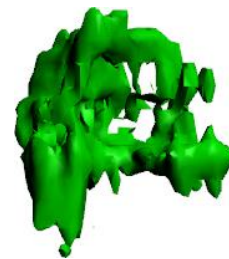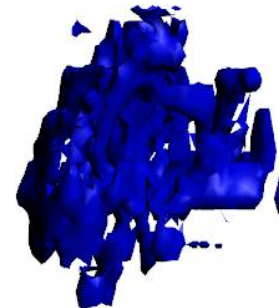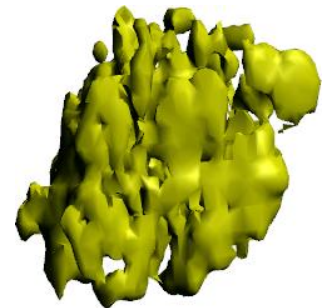

Depot Side  
View

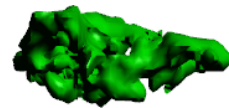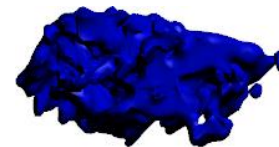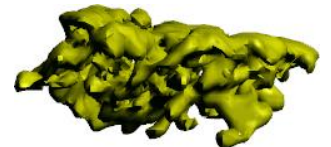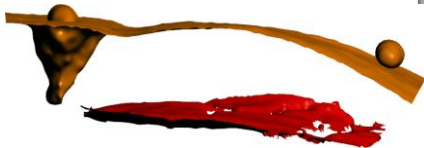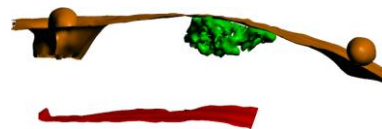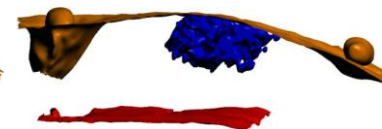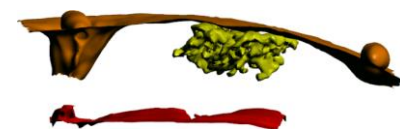

# 012 Abdomen Right

Naive

Cannula

2ml

5ml

10ml

Post

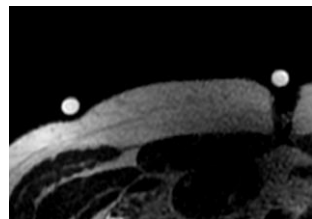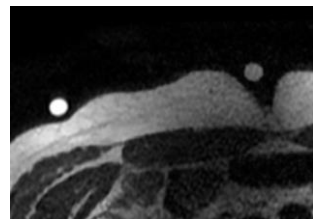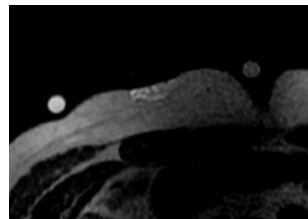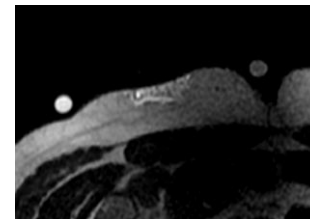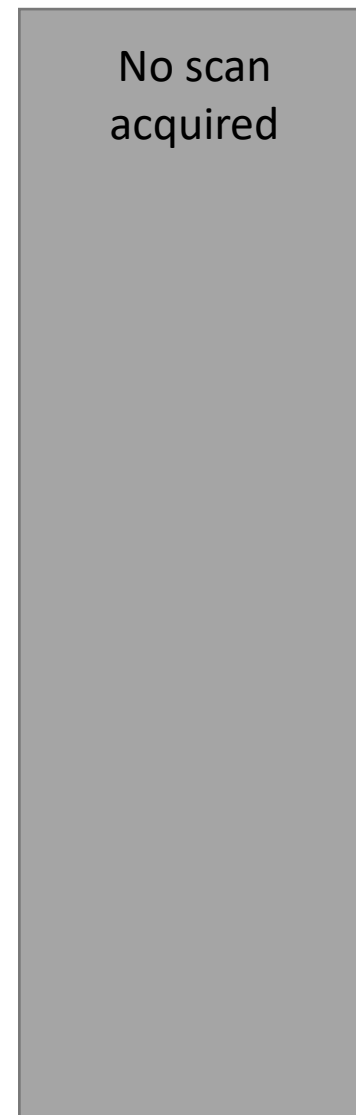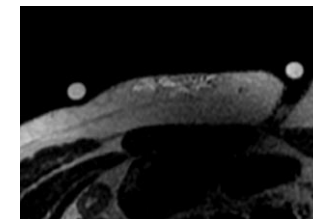

Thickness  
Units:[mm]

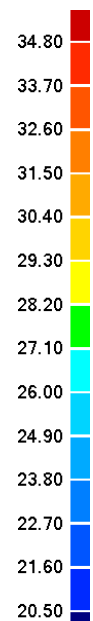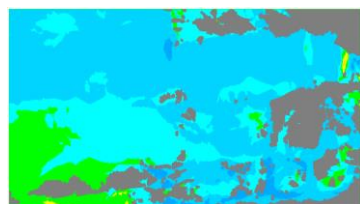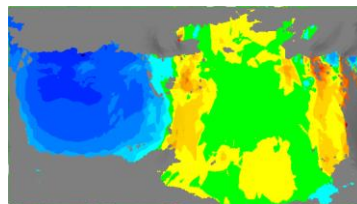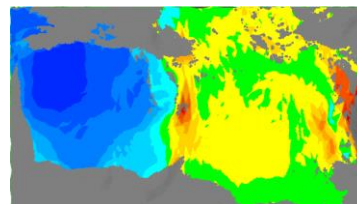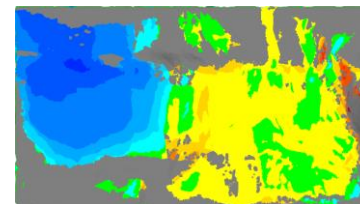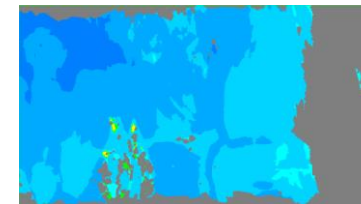

Pre-injection  
no depot

Pre-injection  
no depot

Depot Top  
View

Depot Side  
View

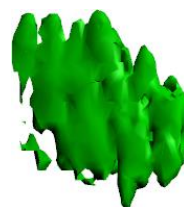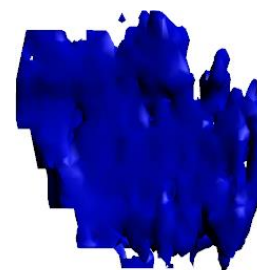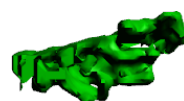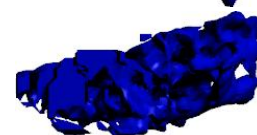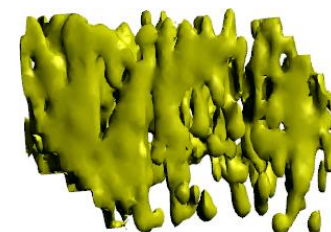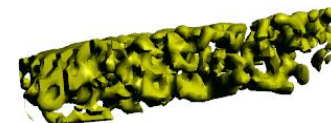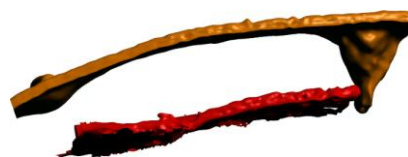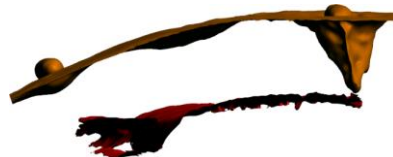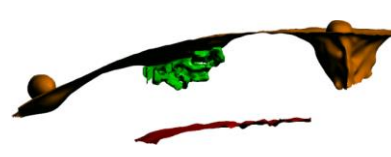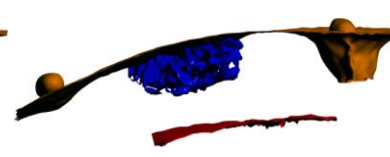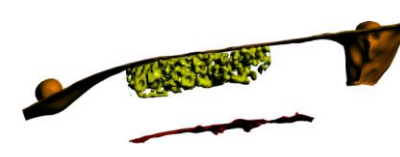



# 012 Arm Left

5C

Naive

Cannula

2ml

5ml

Post

No scan  
acquired

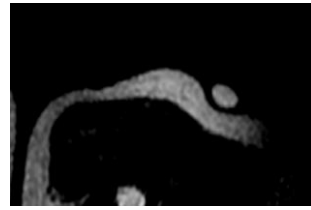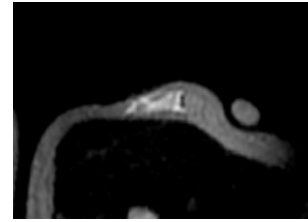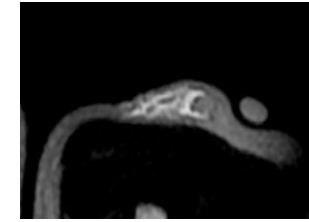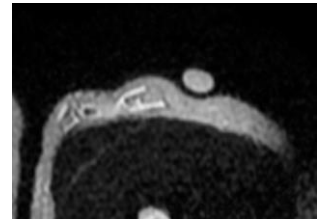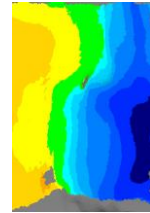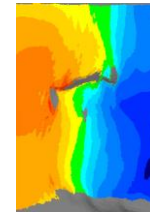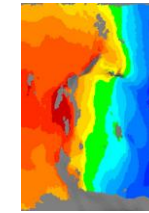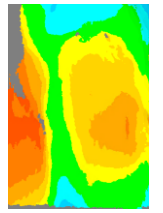

Depot Top  
View

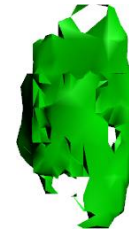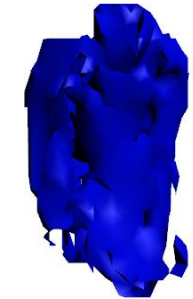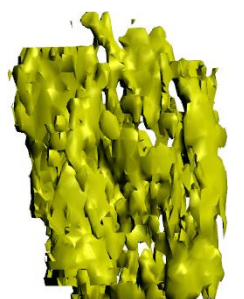

Pre-injection  
no depot

Depot Side  
View

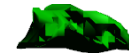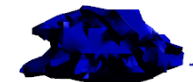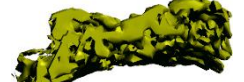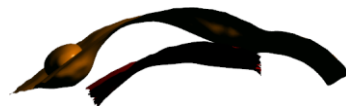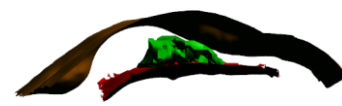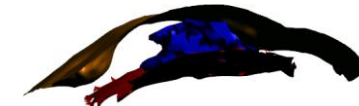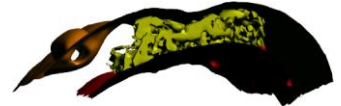

Pre-injection  
no depot

Thickness  
Units:[mm]

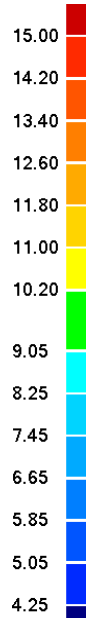

# 012 Thigh Left

Naive

Cannula

2ml

5ml

10ml

Post

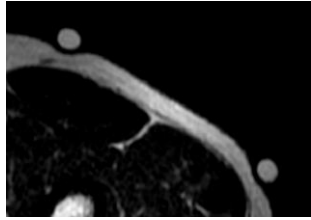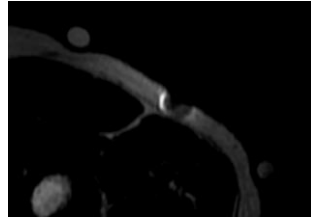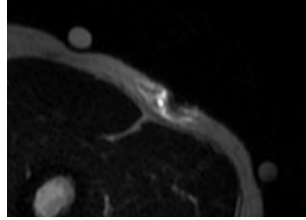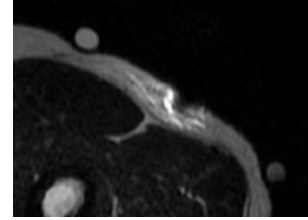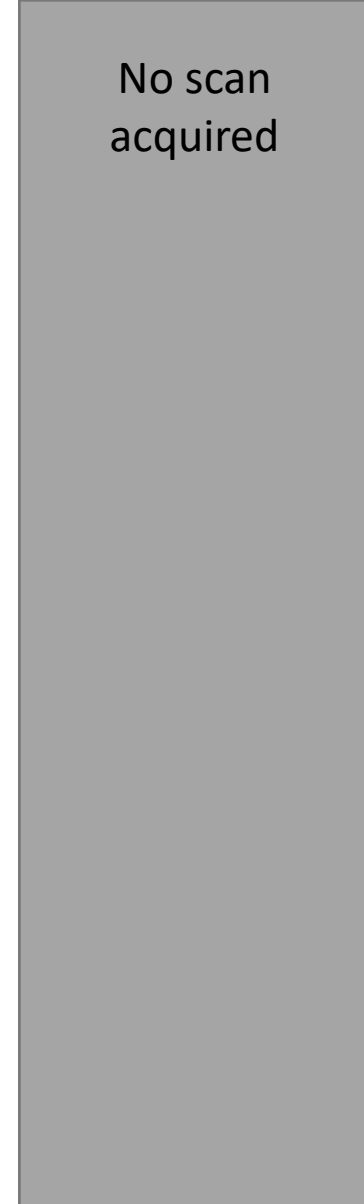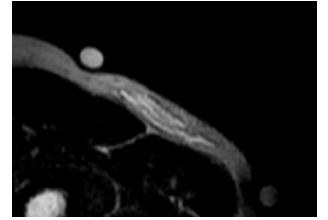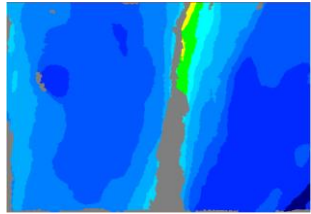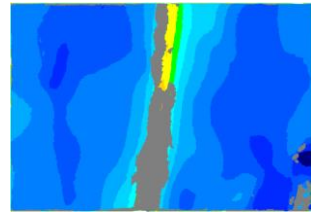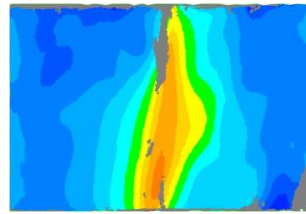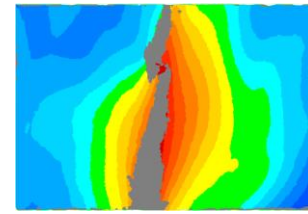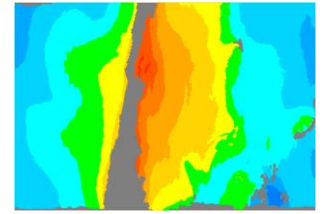

Thickness  
Units:[mm]

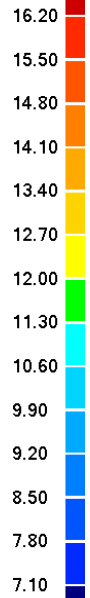

Pre-injection  
no depot

Pre-injection  
no depot

Depot Top  
View

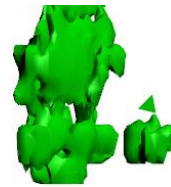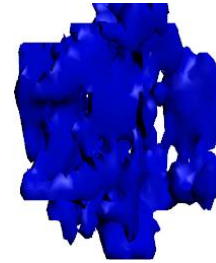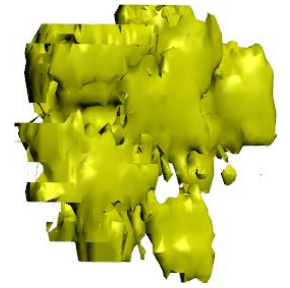

Depot Side  
View

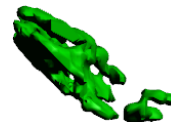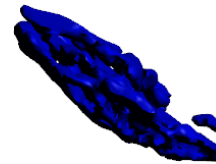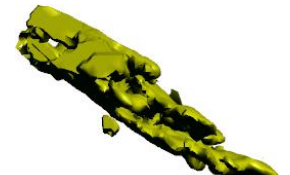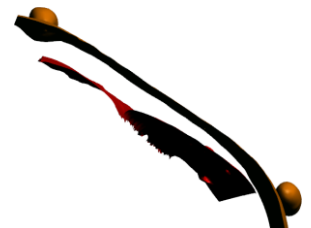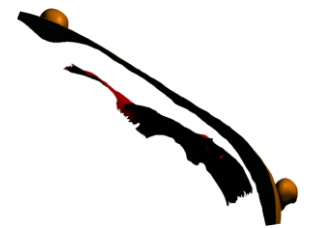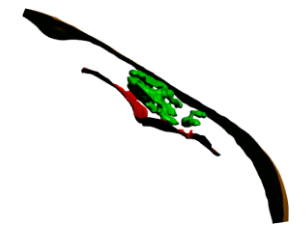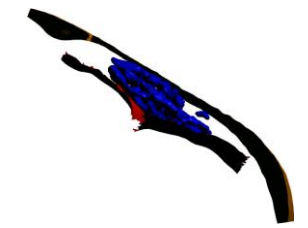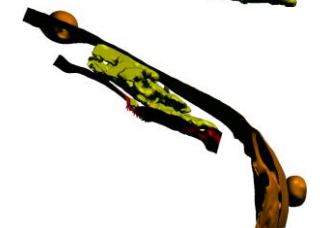

# 012 Thigh Right

Naive

Cannula

2ml

5ml

10ml

Post

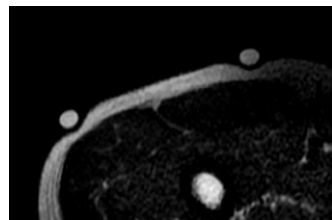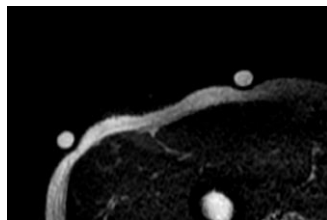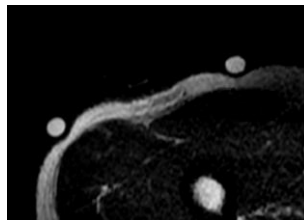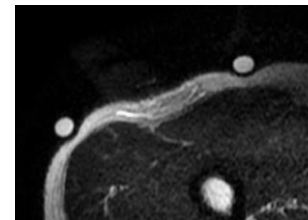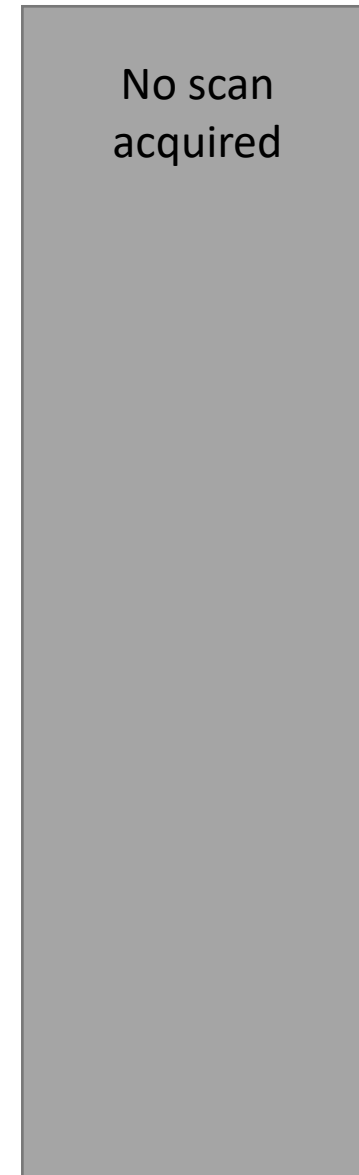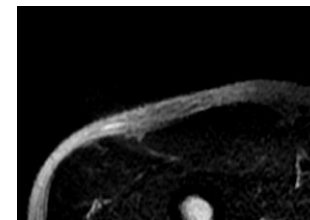

Thickness  
Units:[mm]

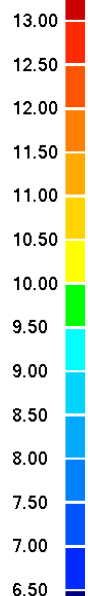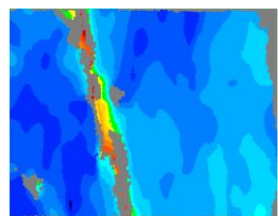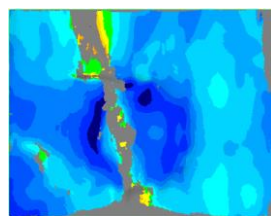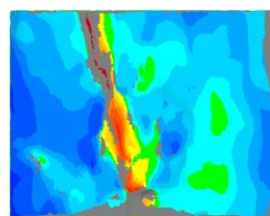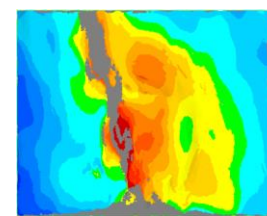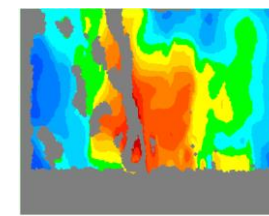

Pre-injection  
no depot

Pre-injection  
no depot

Depot Top  
View

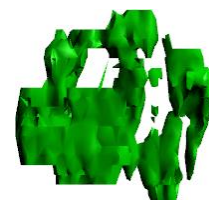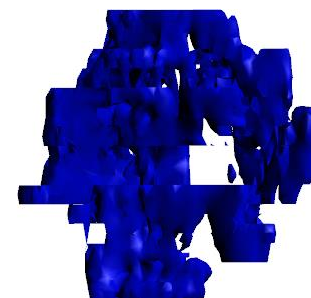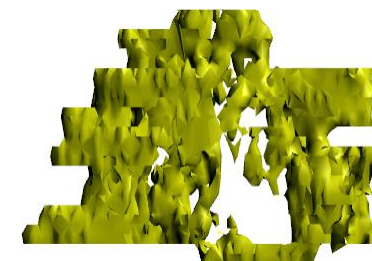

Depot Side  
View

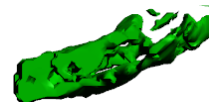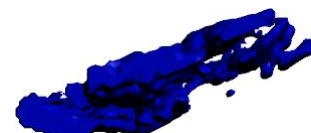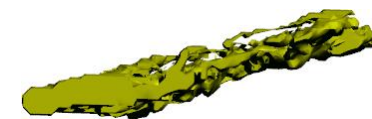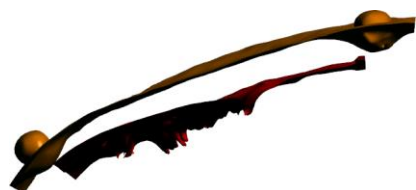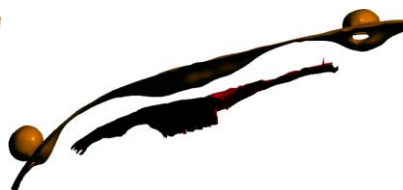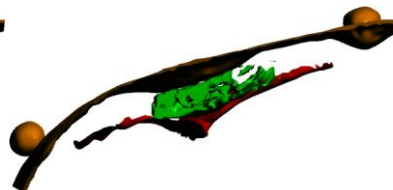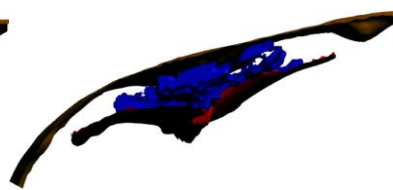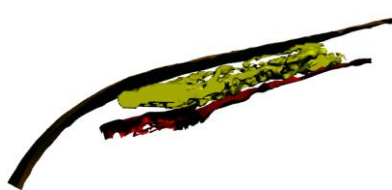

Supplement: MOESM1 [file 13346_2023_1318_MOESM1_ESM.pdf]
